# Supplementary material for: MiRNA-202-5p promotes Colorectal Carcinogenesis through suppression of PTEN
Source: PubMed Central journal article supplement (PMC8100819; doi:10.7150/jca.56186), 2021-03-31
Supplement: jcav12p3154s1.pdf [file jcav12p3154s1.pdf]

Supplementary table 1

| <b>Oligonucleotide sequences of shRNAs</b>                             |                                                   |                              |
|------------------------------------------------------------------------|---------------------------------------------------|------------------------------|
| <b>shRNAs</b>                                                          | <b>Sequence (5'-3')</b>                           |                              |
| shRNA-c-Myc1                                                           | CAGTTGAAACACAAACTTGAA                             |                              |
| shRNA-c-Myc2                                                           | CCTGAGACAGATCAGCAACAA                             |                              |
| shRNA-PTEN1                                                            | CCACAGCTAGAACTTATCAAA                             |                              |
| shRNA-PTEN2                                                            | CTAGAACTTATCAAACCCTTT                             |                              |
| <b>Primers used in qRT-PCR &amp; Semi-quantitative RT-PCR analysis</b> |                                                   |                              |
| <b>Name</b>                                                            | <b>Sequence (5'-3')</b>                           |                              |
|                                                                        | <b>Forward</b>                                    | <b>Reverse</b>               |
| QRT-β-actin                                                            | GTGGCCGAGGACTTTGAT                                | CCTGTAACAACGCATCTCAT         |
| RT-miR-202-5p                                                          | CTCAACTGGTGTTCGTGGAGTCGGCAATTCAGTTGAGCAAAGA<br>AG |                              |
| RT-U6                                                                  | GCTTCACGAATTTGCGTGTCAT                            |                              |
| QRT-U6                                                                 | CTCGCTTCGGCAGCAC                                  | AACGCTTCACGAATTTGCGT         |
| QRT-miR-202-5p                                                         | ACACTCCAGCTGGGTTCCCTA<br>TGCATATACT               | TGGTGTCGTGGAGTCG             |
| ChIP-GAPDH                                                             | TACTAGCGGTTTTACGGGCG                              | TCGAACAGGAGGAGCAGAGA<br>GCGA |
| ChIP-S1                                                                | TCCGACCCTGCACTCTTG                                | GCATCAGGCGGACACTGG           |
| ChIP-S2                                                                | GCTGAGCTGGGCAGGCC                                 | CCTTATCTCCCCACGCGC           |
| <b>Antibodies</b>                                                      |                                                   |                              |
| β-actin (WB 1:1000)                                                    | CST                                               | Cat#3700                     |
| Flag-Tag (WB 1:2500)                                                   | Sigma                                             | Cat#F3040                    |
| PTEN (WB 1:1000,<br>IHC:1:200)                                         | proteintech                                       | Cat#60300-1-Ig               |
| p-Akt (WB 1:1000,<br>IHC:1:400)                                        | proteintech                                       | Cat#66444-1-Ig               |
| Akt (WB 1:1000,<br>IHC:1:500)                                          | Cell signaling                                    | Cat#2920S                    |
| c-Myc (WB 1:1000,<br>IHC:1:500)                                        | Cell signaling                                    | Cat#9402S                    |
| <b>Commercial Assays</b>                                               |                                                   |                              |
| DMEM                                                                   | Gibco                                             | Cat#12800082                 |
| TRIzol                                                                 | Invitrogen                                        | Cat#AM9738                   |
| PrimeScript™ RT<br>reagent Kit                                         | Takara                                            | Cat#RR037A                   |
| SYBR Green 2xTaq mix                                                   | Takara                                            | Cat#RR820A                   |
| Dual-Luciferase®<br>Reporter Assay System                              | Promega                                           | Cat#E1910                    |
| EdU Assay Kit                                                          | Guangzhou RIBOBIO                                 | Cat#C10310-1                 |
| cell cycle assay kit                                                   | Bestbio                                           | Cat#BB-4104                  |
| EZ ChIP™ Chromatin<br>Immunoprecipitation Kit                          | Millipore                                         | Cat#17-371RF                 |
